# Label-free imaging of collagen fibers in tissue slices using phase imaging with computational specificity

*Masayoshi Sakakura<sup>1,2</sup>, Virgilia Macias<sup>3</sup>, André Kajdacsy-Balla<sup>3</sup>, and Gabriel Popescu<sup>1,2,4</sup>*

1. Quantitative Light Imaging Laboratory, Beckman Institute for Advanced Science and Technology, University of Illinois at Urbana-Champaign, Urbana, Illinois, USA
2. Department of Electrical and Computer Engineering, University of Illinois at Urbana-Champaign, Urbana, IL, USA
3. Department of Pathology, University of Illinois at Chicago, Chicago, IL, USA
4. Department of Bioengineering, University of Illinois at Urbana-Champaign, Urbana, Illinois, USA

## ABSTRACT

Evaluating the tissue collagen content in addition to the epithelial morphology has been proven to offer complementary information in histopathology, especially in disease stratification and patient survivability prediction. One imaging modality widely used for this purpose is second harmonic generation microscopy (SHGM), which reports on the nonlinear susceptibility associated with the collagen fibers. Another method is polarization light microscopy (PLM) combined with picosirius-red (PSR) tissue staining. However, SHGM requires expensive equipment and provides limited throughput, while PLM and PSR staining are not part of the routine pathology workflow. Here, we advance phase imaging with computational specificity (PICS) to computationally infer the collagen distribution of *unlabeled* tissue, with high specificity. PICS utilizes deep learning to translate quantitative phase images (QPI) into corresponding PSR images with high accuracy and speed. Our results indicate that the distributions of collagen fiber orientation, length, and straightness reported by PICS closely match the ones from ground truth.



## Introduction

Collagen plays an important role in skin aging [1], is used in surgical treatments of vitiligo [1], and its degradation is known to be associated with proliferation of melanoma cells [2]. It has been shown that collagen fiber orientation can report on tumor aggressiveness via a tumor-associated collagen signature (TACS) [3-6]. Second harmonic generation microscopy (SHGM) maps the second-order non-linear susceptibility  $\chi^{(2)}$  associated with *non-centrosymmetric* molecules and, thus, probes fibrillar collagen structures with high specificity [7]. Collagen generates a strong second-harmonic signal compared to the surrounding cellular structures, resulting in high imaging contrast [8-10]. However, the low contrast of other cellular structures in SHGM images means that centrosymmetric structures, such as, tumor boundaries are difficult to delineate and often other imaging modalities are required [11]. Importantly, due to the phase matching condition, imaging collagen via SHGM is limited to 2D. Recently, it has been shown that using phase-resolved data and a new physical model that takes into account the scattering and phase-matching condition, artifact-free  $\chi^{(2)}$  3D tomography can be obtained [12].

Quantitative phase imaging (QPI) is a rising field in label-free optical imaging for biomedical applications [13, 14]. Unlike many stain-dependent imaging modalities, QPI solely relies on the intrinsic contrast from the density-dependent morphology of the sample, which has a direct correspondence to optical pathlength difference. As a result, QPI can detect transparent, weakly-scattering features from biological samples with nano-scale sensitivity [15-22]. QPI has been applied at a rapid pace in a variety of basic science [23-28] and clinical applications [13, 29-35]. Histopathological applications of QPI implemented in recent years include breast tumor progression [29], prostate cancer prediction [35], and pancreatic ductal adenocarcinoma (PDAC) prognosis [36]. Recently, it has been shown that QPI is extremely sensitive to collagen in histology

slides. Comparing the QPI and SGHM data on the same fields of view, we found that QPI can extract collagen fiber orientation accurately and also provide the contextual structures, absent in SHGM [5, 36]. Spatial light interference microscopy (SLIM) is a highly sensitive QPI technique widely used for biomedical applications [14, 17, 37, 38]. One of the appealing features of SLIM is that it can be implemented as a module attached to the camera port of a commercial phase-contrast microscope [17, 38, 39]. This versatility of SLIM installation allows multi-channel, correlative imaging, in combination with fluorescence [40] or other modalities, such as polarization light microscopy, which is relevant to our study here. In addition, SLIM interfaces seamlessly with the motorized microscope and allows for whole slide QPI [35]. Since SLIM takes advantage of low-coherence light source into a completely common-path microscopy system, the acquired image from SLIM has a very low spatial and temporal noise level.

Recently, deep learning has shown a tremendous potential in biophotonics in general and microscopy in particular [41-45]. Ozcan and colleagues have pioneered image to image translation approaches based on deep learning resulting in synthetic images of stains and fluorescence extracted from label-free data [46-49]. Our group has advanced a family of tools collectively referred to as phase imaging with computational specificity (PICS) which aims to achieve chemical specificity from unlabeled specimens, using deep learning [40, 50-54]. Thus, PICS allows for nondestructive imaging, of low exposure and chemical phototoxicity, while maintaining the specificity associated with exogenous contrast agents.

In this study, we advance the PICS concept to problems of clinical relevance. We demonstrate that label-free analysis of collagen fibers can be performed with high specificity by combining SLIM with deep learning. We developed a multimodal imaging instrument that yields

both SLIM and polarized light microscopy (PLM) images from the same field of view. Thus, we used the traditional picosirius-red (PSR) stain, which is specific to collagen in polarized microscopy, to acquire images of the collagen fibers as ground truth. On the same field of view, we acquired SLIM data, such that the resulting pairs of images were used for training the Efficient U-Net [55] to infer synthetic PSR images from QPI data as input. We validated the trained network over an unseen SLIM dataset to evaluate the network's capability for label-free identification of collagen fibers. We further used a collagen fiber tracking algorithm, referred to as CT-FIRE [6, 56, 57] and showed that it can directly be applied on the PICS-generated collagen map without the need of PSR stains. Using CT-FIRE we further performed segmentation to detect individual fibers and analyze their statistical distribution in terms of length, straightness, and angle of orientation. Our results show a strong statistical similarity between the CT-FIRE output from the ground-truth dataset and the corresponding distributions from the PICS inference.

The manuscript is structured as follows. 1) We present the SLIM/ PLM setup and the corresponding images acquired, 2) Efficient-U-Net architecture and the performance metrics, 3) CT-FIRE analysis of extracted collagen fibers, and 4) statistical validation of the collagen fiber distributions. In the Methods section, we elaborate on the optical setup and hardware used for SLIM and PLM, the PICS implementation, and the CT-FIRE algorithm for statistical validation.

## Results

## SLIM and PLM multimodal imaging system

We combined SLIM, which yields quantitative phase maps associated with the specimen [17, 38], and polarization light microscopy (PLM), which reports on the birefringence associated with the PSR intensity distribution [56, 58, 59]. The configurations for both imaging modalities are discussed in more detail in the Methods section. Briefly, as shown in Figure 1, both SLIM and PLM modules are attached to the side ports of a commercial microscope. SLIM uses the phase contrast channel and consists of an external optical module that generates additional phase-shifts between the incident and scattered fields [17, 38]. PLM imaging is done under a cross-polarized brightfield optical path, in which only the regions with birefringence in the sample generate signal [60].

For PICS training and testing, we imaged a total of 217 cores from a prostate tissue microarray (TMA), resulting in a total of 1,000 fields of view imaged by both SLIM and PLM. Using the overlap percentage between adjacent frames to 5 %, we digitally mosaicked individual fields of view to obtain images of the entire cores, 900  $\mu\text{m}$  diameter each. **Figure 2** presents both the microscopic and the macroscopic images acquired under SLIM and PLM. The PLM channel allows us to localize and analyze the collagen fiber content with high specificity [56, 58, 59], while SLIM reports on tissue morphology information without staining, providing contextual information, such as epithelium and non-collagen extracellular matrix [54].

## Procedures Prior to Network Training

The PICS method for collagen detection follows the workflow shown in **Figure 3a**. The experimental procedure first begins by acquiring the image dataset under both SLIM and PLM.

We then discard the empty frames, i.e., the fields of view that contain only background and have no tissue content. An important part of the preprocessing is the proper registration of the images from the two channels. The MATLAB registration estimator app was initially used to infer a transformation matrix that geometrically transforms the images from the PLM camera to match those from the SLIM camera. The evaluated matrix was then used to transform all the collected PLM images to complete the registration process as shown in **Figure 3b**. The preprocessed image pairs are randomly assigned into either training, validation, or test set for E-U-Net training. Figure 3c presents the fiber extraction from a TMA core using the CT-FIRE.

### **Efficient U-Net**

In order to detect solely the collagen fibers from the SLIM image, we trained a convolutional neural network with SLIM as input and PLM images as the ground-truth. We used a modified U-Net, referred to as the Efficient U-Net (E-U-Net) [55]. The encoding path of E-U-Net is the EfficientNet in which the network was pretrained on image dataset from ImageNet [61]. Such modification reduces the complexity of the original U-Net, while keeping the accuracy very high [62, 63]. The detailed depiction of the overall network architecture of E-U-Net and the convolutional layer diagram of the EfficientNet encoding path are illustrated in **Figures 4a and 4b**, respectively. The learning rate is shown in Fig. 4c.

From the 710 acquired SLIM-PLM pairs, we trained the E-U-Net network with 496 SLIM-PLM pairs of images and used 142 pairs as validation set. We used a linear combination of two different loss functions, namely, the mean absolute error loss and Pearson correlation loss to find the updated model weights that best optimize the equivalent loss function. We used the

EfficientNet B5 network as the backbone encoder of our E-U-Net and ran it for 200 epochs. The minimum value of the loss function was attained at epoch 65 as shown in **Figure 4d**, which we used to evaluate the accuracy metrics over the validation and test data sets. We discuss in more detail the training parameters and the interpretation of the network structure in the Methods section.

### **Evaluation of Trained Model Over the Test Set**

To assess the inference performance, we applied the best model described above over 72 test datasets containing SLIM and PLM images. These 72 pairs were kept separate from the training set and, thus, were not “seen” by the E-U-Net. **Figure 5a** illustrates three SLIM core images. **Figures 5b and 5c** show the ground-truth and PICS prediction, respectively. Using the 142 validation images to assess the network performance, the training script evaluated the average peak signal-to-noise ratio (PSNR) and structural similarity index measure (SSIM). The PSNR and SSIM values for the PICS inference were 31.7 and 0.75, respectively. The SSIM value from our model is within the acceptable level of performance according to previous reports [64]. One of the key features of both the original PLM image and PICS inference is that the glandular regions disappear, since glands are regions rich in epithelial cells that do not exhibit birefringence.

### **CT-FIRE Results on Test Datasets**

In order to validate PICS for the stain-free orientation analysis of collagen, we used the CT-FIRE (Curvelet Transform – Fiber Extraction) algorithm, originally used to localize



individual collagen fibers from second harmonic generation microscopy images [6]. Previous applications indicated that the CT-FIRE algorithm can also be applied to PLM images [57] and even SLIM images [56], assuming that the data contain isolated collagen fibers. CT-FIRE takes advantage of the curvelet transform algorithm to create a segmented map consisting of detected collagen fibers from a given input image (**Figure 3c**). We extracted individual collagen fibers from each of the test ground-truth and the PICS inference and evaluated the statistics of the angular orientation, straightness, and the length associated with each localized fiber, as shown in **Figures 6a and 6b**. In **Figure 6b**, we plotted the histogram distributions for fiber angle, length, and straightness associated with both the ground-truth PLM and PICS output, as indicated. The histogram comparison shows strong overlap, indicating that PICS information can be used for analyzing collagen fibers directly on unlabeled specimens.

### **Validation of CT-FIRE Statistics**

In order to validate our CT-FIRE results, we applied a two-distribution t-test at 5 percent significance level over each of the 72 pairs consisting of ground truth and the corresponding PICS output for length, angle, and straightness (Fig. 6b). The t-test returned a significant statistical similarity between the ground truth and the PICS result ( $p \gg 0.05$ ). From this quantitative result, we can conclude that PICS inference of the PLM image from SLIM input can be used for clinical inference in the absence of a physical stain.

## **Methods**

## Preparation of Tissue Microarray

The tissue microarray (TMA) used in this study was prepared from 217 prostate patients, with approximately 4 to 5 cores sampled per patient. Gleason grading was performed over the 192 cases by the uropathologists based on the standard presented by the International Society of Urological Pathology (ISUP). Of the 192 cases analyzed, 67 scored a Gleason score 5-6, 103 scored 7, and 22 scored 8 to 10. Each tissue sample was deparaffinized prior to the staining process. The deparaffinized cores were then stained with picosirius red and H&E. Lastly, the stained sections were cover-slipped by the laboratory at University of Illinois at Chicago.

## SLIM System

SLIM imaging is achieved by connecting an external SLIM module (CellVista SLIM Pro, Phi Optics, Inc.) on the side port of a phase contrast microscope [38]. The SLIM principle of operation is presented Ref. [17] and recently reviewed in Ref. [38]. In short, the SLIM module consists of a 4f lens system [65] and a space light modulator (SLM) in its Fourier plane to apply  $\pi/2$ ,  $\pi$ ,  $3\pi/2$ ,  $2\pi$  phase shifts in addition to the existent  $\pi/2$  phase shift applied by the phase contrast objective ring. From a set of four phase contrast images, we compute the quantitative phase delay from the sample. For SLIM, we used the 40x phase contrast objective with 0.75 numerical aperture and collected the images using an ORCA-Flash 4.0 CMOS camera (Hamamatsu). We set both the exposure time and the SLM stabilization time at 30ms.

## PLM System

PLM image setup is shown on the right port of the microscope in Figure 1a, which is essentially brightfield microscopy with the sample between two orthogonal polarizers. We placed the first

linear polarizer on top of the condenser module of the inverted microscope and the corresponding analyzer right before the camera. Thus, the light from isotropic regions of the tissue undergoes full extinction upon encountering the cross-polarized analyzer. The PLM only transmits the light emerging from the birefringent regions of the tissue sample, mainly the PSR-stained collagen. For the PLM acquisition we used a 40x/0.75NA bright-field objective, which is consistent with the phase contrast objective used in SLIM. The PLM image was captured using a Neo CMOS camera (Andor) with 100 ms acquisition time.

## **Image Registration**

Image registration is very important for our image-to-image transformation using the convolutional neural network. Differences in the fields of view between the input SLIM image and the ground-truth PLM image may arise from slight shifts and rotational misalignments between the two cameras in Figure 1. We used the MATLAB image registration estimator to correct such geometric misalignment. The estimator takes in two images, one as a fixed reference and the other as the image to be transformed to match the prior. Then the estimator outputs the transformation matrix which incorporates all types of transformations such as rotation, scaling, and affine. MATLAB image registration estimator offers various algorithms for feature recognition between the pair, as well as tunable parameters for optimization processes.

In order to maximize the performance of the feature recognition involved, we used two phase-contrast microscope images captured by both the left and right cameras. We assigned the image from the SLIM camera (on the left side of Figure 1) as the fixed reference image and the corresponding image from the PLM camera (on the right side of Figure 1) as the image to be

transformed. The SURF (Speeded Up Robust Features) algorithm was selected for feature detection algorithm. This SURF algorithm detects significant features using the determinant of the Hessian of the input pair [66]. Then, the detected features are juxtaposed by the estimator to approximate the transformation matrix. Assuming mechanical stability, we applied the calibrated transformation matrix on every acquired PLM image prior to the network training.

### **Efficient-UNet Network and Training**

Efficient-UNet (E-U-Net) is a convolutional neural network originated from the regular U-Net [67] that infers the PLM counterparts of the input SLIM images without the presence of histological staining. The main difference between the U-Net and the E-U-Net is that E-U-Net uses a more efficient pre-trained encoder, EfficientNet, in the encoding path [55]. EfficientNet is a compact convolutional neural network that retains its very high performance while lowering the number of total network parameters being used in order to increase the convergence rate. Branching off from the EfficientNet B0, the least complex, more complex architectures were built ranging from B1 to B7 by adding more layers for higher performance [55]. We empirically selected the best performing EfficientNet architecture, EfficientNet B5, as the pre-encoder of our E-U-Net training session by juxtaposing the minimum loss function value attained by each architecture.

The dimension of the images used to train the network were of 2048 by 2048, which is equivalent to 300x300  $\mu\text{m}^2$  field of view. In order to reduce storage burden on the GPU hardware during training, we randomly selected 800 by 800 crops for every iteration of training session. The model was trained with a total of 37,468,673 parameters and ADAM optimizer to minimize

loss functions [68]. We utilized a linear combination of mean absolute error loss and Pearson correlation loss function to assess both the training loss and the validation loss presented in Figure 5b. We used the mean absolute error (L1) over the mean squared error (L2) since Mean Absolute Error (MAE) emphasizes very strict boundary, and MSE allows more loose cutoff boundary [69]. Having a strict boundary is very important especially when we need to extract morphometric information per collagen fiber in the CT-FIRE analysis. The learning rate was designed such that the rate of convergence decreases with a diminishing cosine profile [70] as shown in **Figure 5c**, starting from the initial value of  $10^{-4}$ . We trained the network for a total of 200 epochs and selected the neural network model that yielded the least loss function labeled with a red circle in **Figure 5b**.

We used the NVIDIA GeForce RTX 2080 GPU hardware throughout the E-U-Net training under CUDA 10.1. All scripts used for training and validation were written and run with Python 3.6 and TensorFlow 1.14.0.

### **CT-FIRE Analysis**

We used the CT-FIRE algorithm, as described by Bredfeldt et al. [6], to automatically extract the fibers for the ground-truth and corresponding PICS inference result for each field of view. The algorithm of CT-FIRE first starts by performing a 2D curvelet transform on the images, which creates a visualization of both the position and the spatial frequency [71, 72]. The main use of curvelet transform is to emphasize the line-like features and suppress background noise within a given image [6]. The algorithm further performs a transform to show the distance from a given pixel to the background. By tracing the path of maximum distance, the algorithm extracts list of

line-like features including what is referred in the original CT-FIRE literature as the nucleation points [6]. Lastly, the algorithm removes some fibers that may be either too short or too wide to present a colored segmentation map of detected fiber strands (see **Figure 3c**). The algorithm also returns a list of metrics (length, width, straightness, and angle) associated with all fibers detected. Our results indicate significant similarity between the CT-FIRE output generated on the ground-truth and PICS images, as shown by performing the two-distribution t-test for each metric.

For the validation process, we ran the CT-FIRE script over 72 pairs of ground-truth and corresponding PICS prediction unseen by the trained network to run the two-distribution t-test over length, angle, and straightness separately. The null hypothesis used in the t-test is that the two distributions are like the ones between the ground-truth and prediction. We used 5% (0.05) for the statistical significance threshold.

## **Summary and Discussion**

We showed that PICS allows label-free, non-destructive collagen imaging and characterization, without the need for picrosirius red stain or SHGM imaging. Central to this accomplishment is SLIM's capability to yield a quantitative assessment of tissue morphology with high sensitivity. We used the PICS method to infer the PSR-stained image from the SLIM dataset as input. The PSNR and SSIM evaluated over the unseen test data set were 31.7 and 0.75, respectively. Upon network inference, we used the CT-FIRE algorithm to extract morphological statistics on the individually identified fibers.

While SLIM measurement yields label-free quantitative phase images of the complete tissue architecture, PLM, with the aid of picrosirius-red stain, provides images specifically of

collagen fibers. PICS combines the advantages of the two modalities through the power of deep learning. Label-free imaging of collagen with high specificity can be performed without staining or other preparation beyond tissue slicing. As collagen imaging and analysis has a variety of applications from cancer pathology [3, 4, 11, 73, 74] to skin aging [75, 76] and wound healing [77], we anticipate that PICS inference of collagen fibers can be implemented on unstained tissue samples from various organs. Since SLIM can be implemented as an upgrade to an existing phase contrast microscope, and the deep-learning algorithms can run on a typical PC, it is likely that this approach can be adopted broadly in clinical practice.

## Figures

Figure 1: **Schematic of dual-camera imaging setup involving SLIM and PLM.** The dual-camera setup consists of a standard inverted optical microscope with two external modules attached on either side of the output port. The light-path can be switched by turning the exiting beam-splitter. The condenser aperture for the SLIM is a simple dark-field illumination which is very typical for phase-contrast microscopy. The condenser aperture used for polarized illumination consists of input polarizer P2 on top of a brightfield condenser aperture. The output linear polarizer P3 is placed in polarization module so that its transmission axis is orthogonal to that of P2.

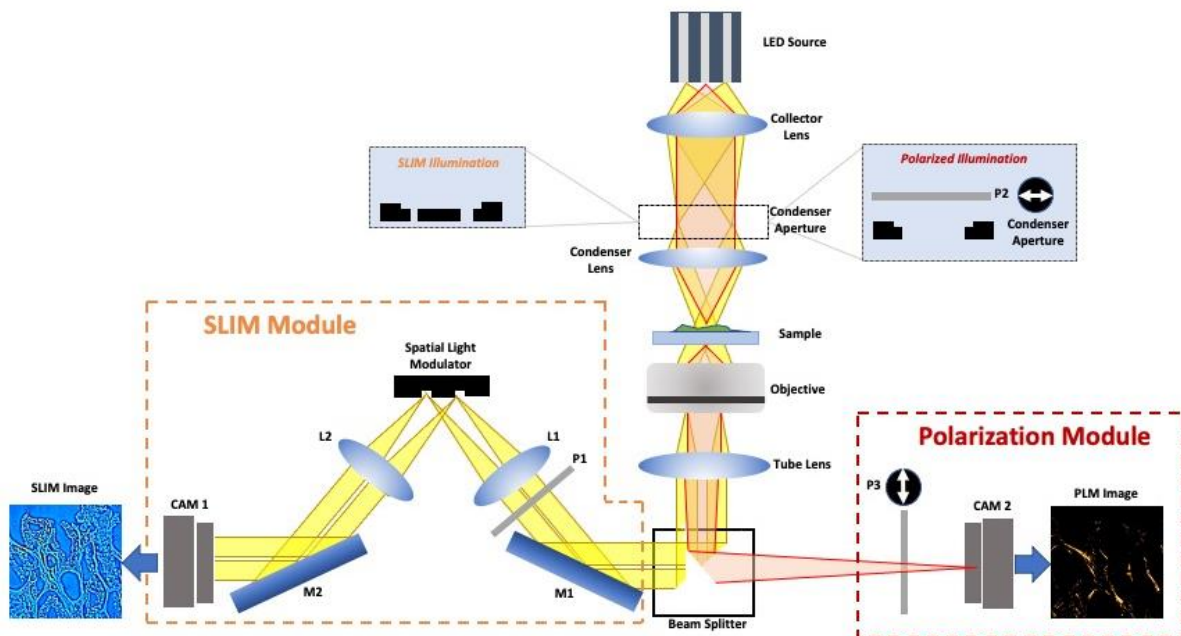



Figure 2: **TMA core imaged with SLIM and PLM.** **a.** A digitally stitched TMA core imaged with SLIM (top) and PLM (bottom). The white bar represents 200 microns in length. **b.** A single field of view from a core imaged under SLIM (top) and PLM (bottom). The white bar represents 50 microns in length.

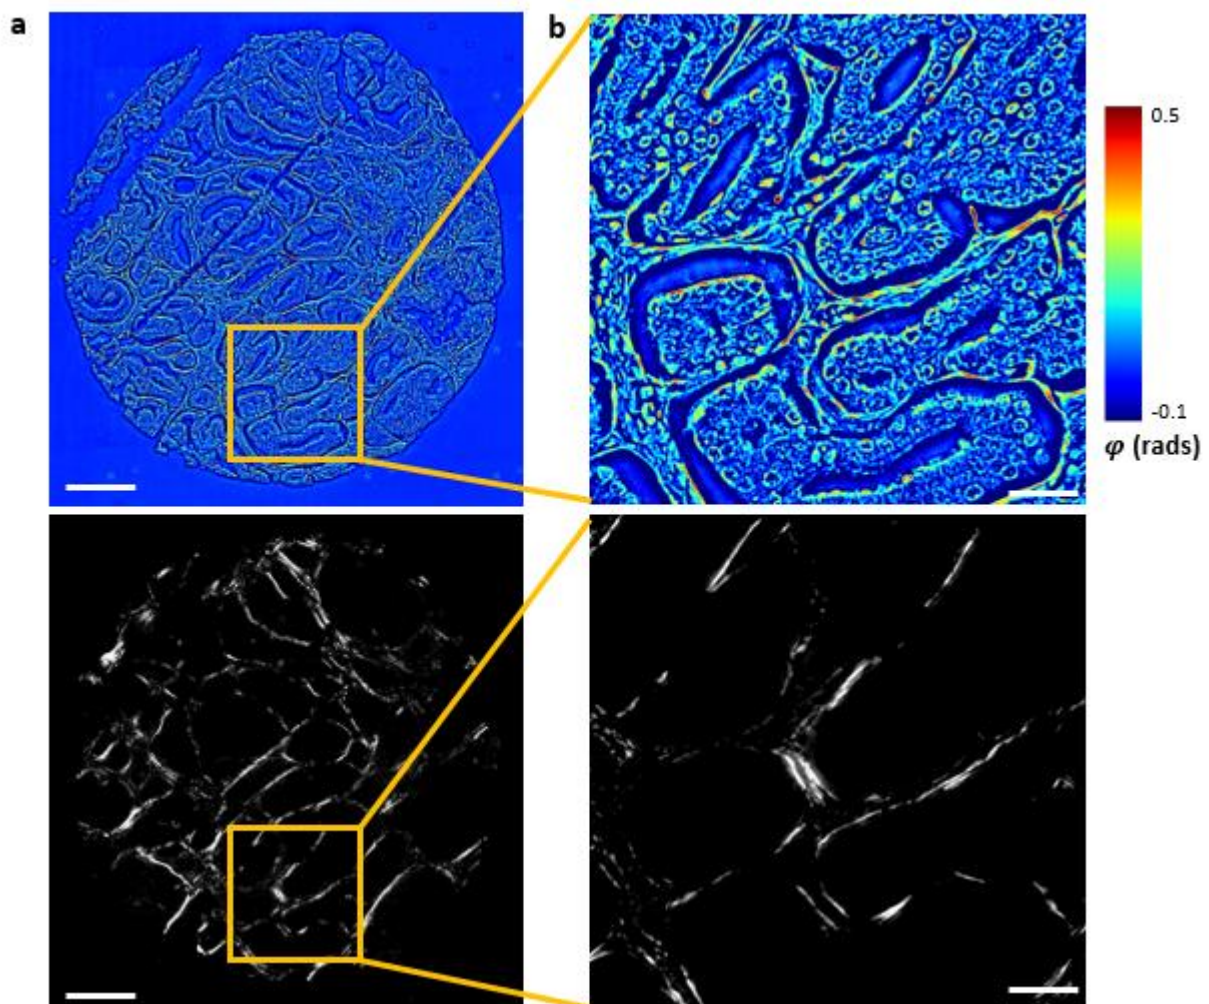

Figure 3: **General workflow diagram of PICS training and validation.** **a.** The standard procedure for PICS implementation first begins from acquiring the SLIM and PLM images. Upon preprocessing, the image pairs are used to train the E-U-Net. Lastly, the inference from the E-U-Net is further analyzed using CT-FIRE and fiber statistics are deeply analyzed for validation process. **b.** Following manual 90 degrees rotation of PLM images, we use the MATLAB registration algorithm (SURF algorithm, specifically) to finely obtain transformation matrix to be applied over the entire PLM images. **c.** CT-Fire extraction process is done over MATLAB script with adjustable intensity and length thresholding strategy appropriate for each ground truth and prediction image dataset.

**a** Workflow Diagram

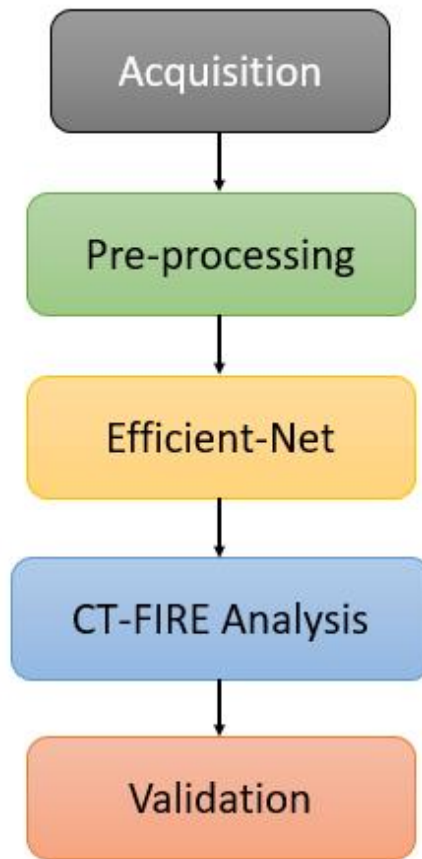

**b.** Registration Procedure

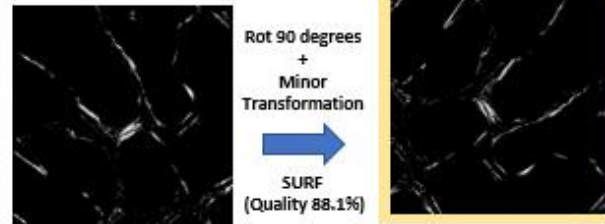

**c.** CT-FIRE Fiber Extraction

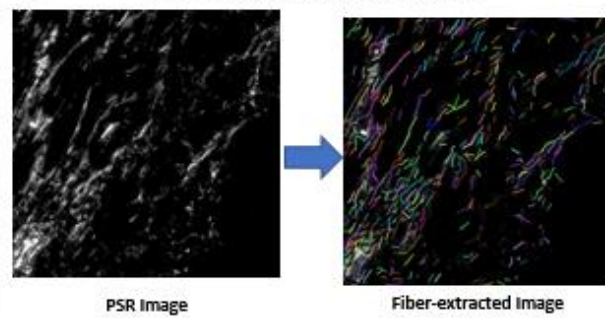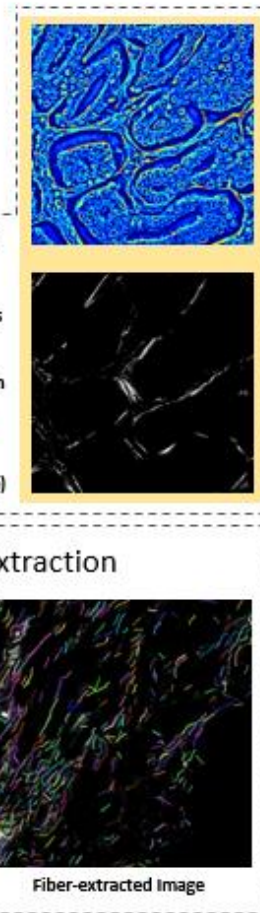

Figure 4: **The network description.** **a.** Overall encoding and decoding path of the path. The encoding path involves pretrained Efficient-Net encoder. **b.** Detailed block structure of Efficient-Net B5 used for training. The encoder consists of one regular convolution layer (labeled in gray) and seven distinct blocks consisting of inverted mobile bottleneck (MB) convolution operations. **c.** Plot of the cosine learning rate over training epochs. **d.** Training and validation loss curve over epochs trained. The best validation loss was attained at epoch 65 (Labeled accordingly).

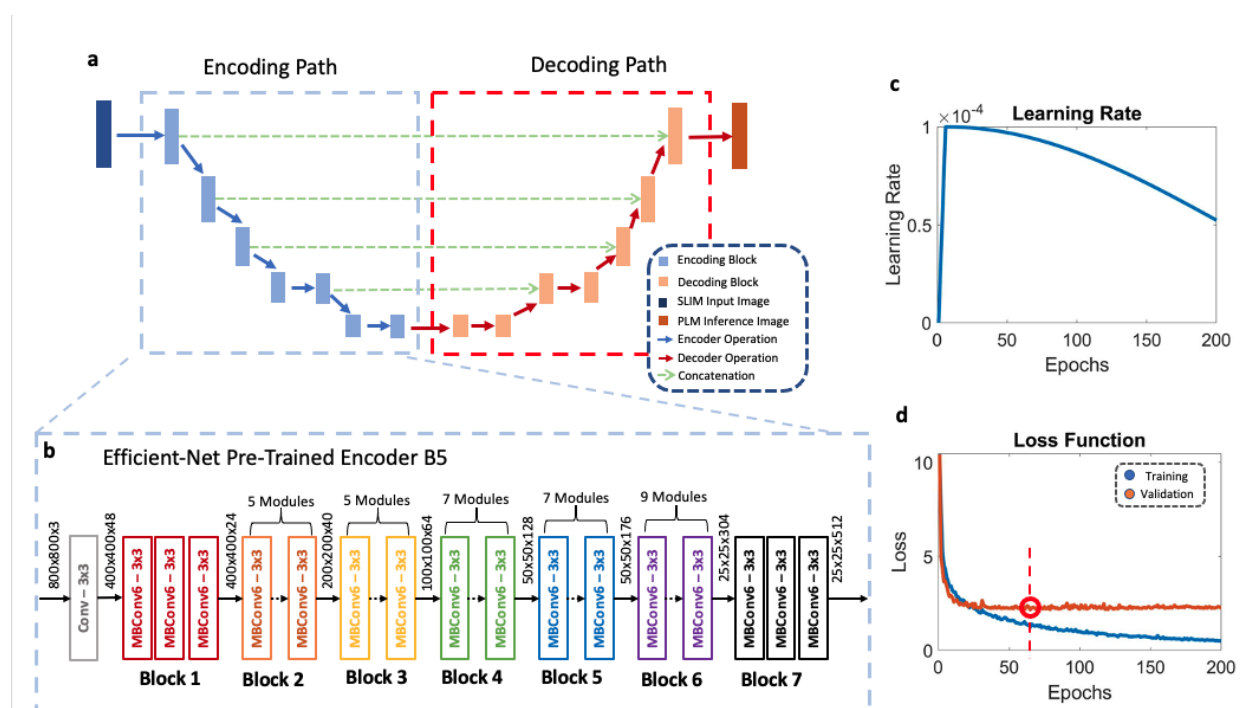

Figure 5: **Result of E-U-Net performance over test dataset.** **a.** SLIM input image of cores input to the network. **b.** The corresponding PSR ground truth images. **c.** PICS prediction of PSR signal. The white scale bar for each image represents 200 microns in length.

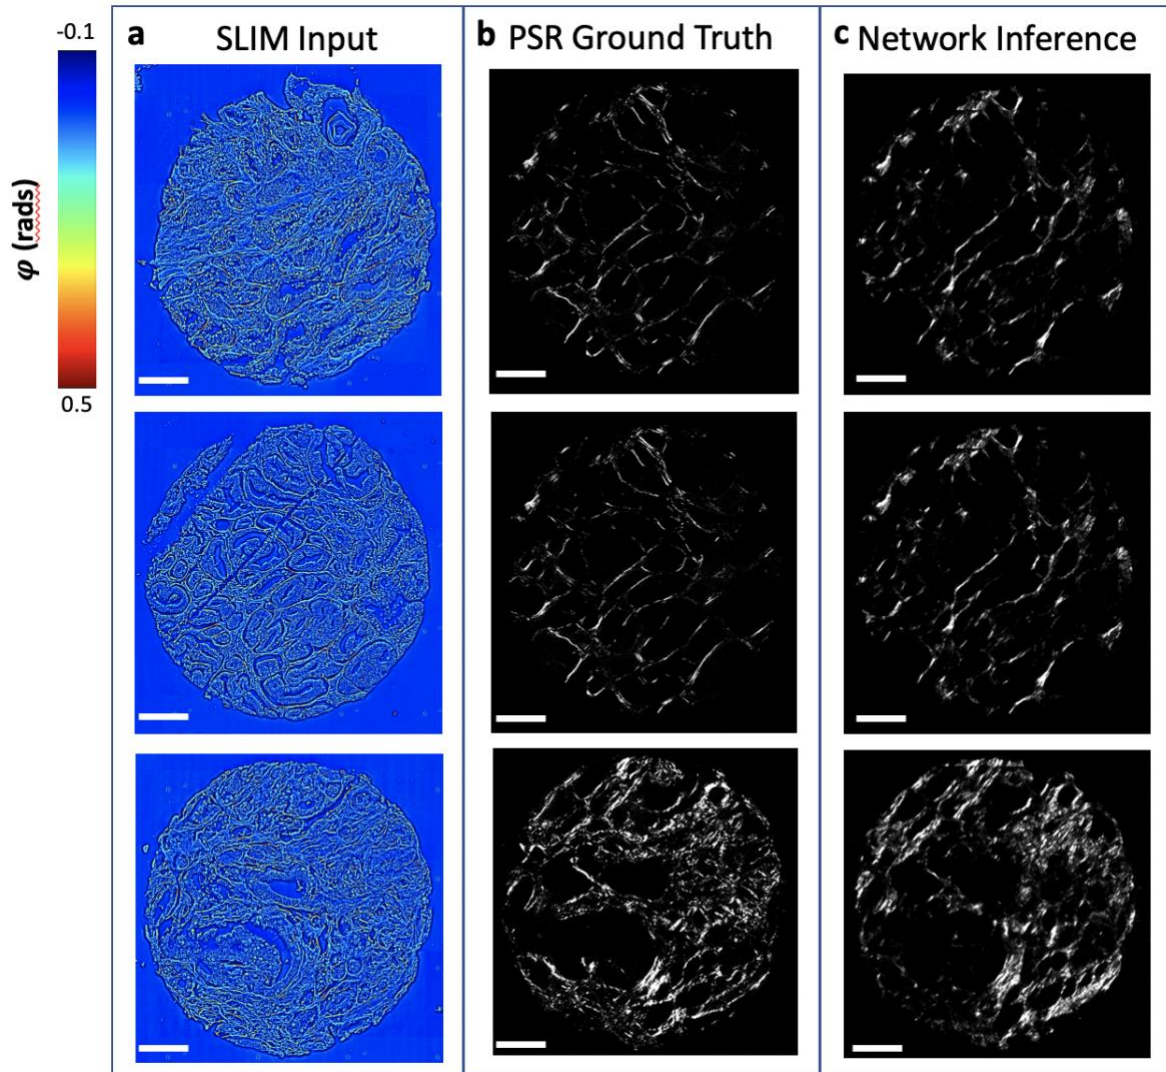



Figure 6: **Result from the CT-FIRE analysis.** **a.** Mapped collagen fibers on ground truth and prediction images. **b.** Discrete probability distribution for length, angle, and straightness of detected collagen fibers. The p-values denoted in the bar graphs indicate statistical similarity of two red and blue bar graphs.

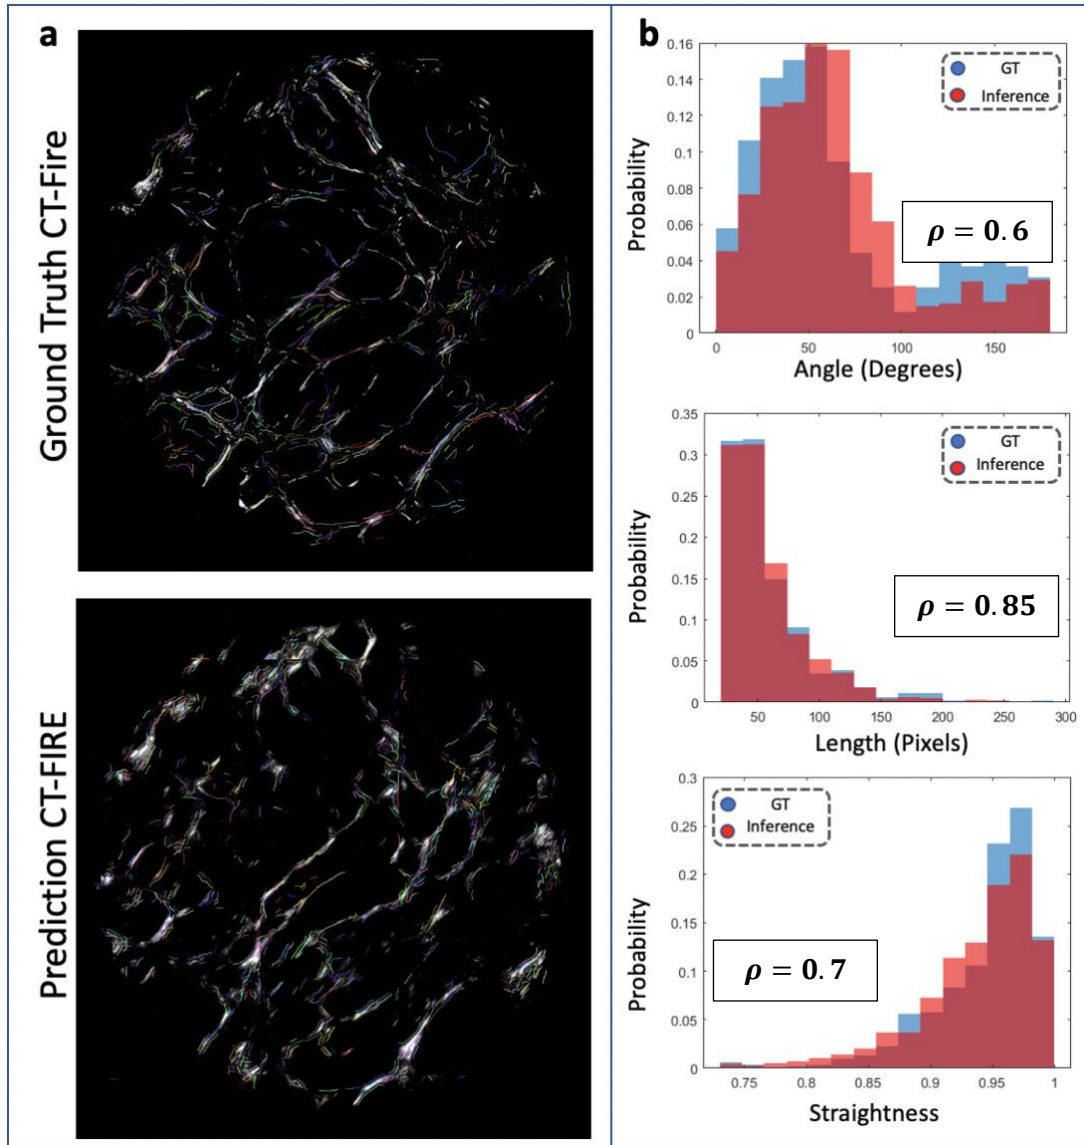

## ReferencesUncategorized References

1. Mulekar, S.V., *Melanocyte–keratinocyte cell transplantation for stable vitiligo*. International journal of dermatology, 2003. **42**(2): p. 132-136.
2. Montgomery, A., R.A. Reisfeld, and D.A. Cheresch, *Integrin alpha v beta 3 rescues melanoma cells from apoptosis in three-dimensional dermal collagen*. Proceedings of the National Academy of Sciences, 1994. **91**(19): p. 8856-8860.
3. Conklin, M.W., et al., *Aligned collagen is a prognostic signature for survival in human breast carcinoma*. The American journal of pathology, 2011. **178**(3): p. 1221-1232.
4. Provenzano, P.P., et al., *Collagen reorganization at the tumor-stromal interface facilitates local invasion*. BMC medicine, 2006. **4**(1): p. 1-15.
5. Majeed, H., et al., *Quantifying collagen fiber orientation in breast cancer using quantitative phase imaging*. Journal of biomedical optics, 2017. **22**(4): p. 046004.
6. Bredfeldt, J.S., et al., *Computational segmentation of collagen fibers from second-harmonic generation images of breast cancer*. Journal of biomedical optics, 2014. **19**(1): p. 016007.
7. Chen, X., et al., *Second harmonic generation microscopy for quantitative analysis of collagen fibrillar structure*. Nat. Protocols, 2012. **7**(4): p. 654-669.
8. Zoumi, A., A. Yeh, and B.J. Tromberg, *Imaging cells and extracellular matrix in vivo by using second-harmonic generation and two-photon excited fluorescence*. Proc Natl Acad Sci USA, 2002. **99**.
9. Liu, Y., et al., *Multimodal nonlinear microscopy by shaping a fiber supercontinuum from 900 to 1160 nm*. IEEE Journal of Selected Topics in Quantum Electronics, 2011. **18**(3): p. 1209-1214.
10. Fast, A., et al., *Fast, large area multiphoton exoscope (FLAME) for macroscopic imaging with microscopic resolution of human skin*. Scientific reports, 2020. **10**(1): p. 1-14.
11. Bredfeldt, J.S., et al., *Automated quantification of aligned collagen for human breast carcinoma prognosis*. Journal of Pathology Informatics, 2014. **5**: p. 28.
12. Hu, C., et al., *Harmonic optical tomography of nonlinear structures*. Nature Photonics, 2020.
13. Park, Y., C. Depeursinge, and G. Popescu, *Quantitative phase imaging in biomedicine*. Nature Photonics, 2018. **12**(10): p. 578.
14. Popescu, G., *Quantitative phase imaging of cells and tissues*. 2011: McGraw-Hill Education.
15. Mir, M., et al., *Quantitative phase imaging*. Progress in optics, 2012. **57**(133-37): p. 217.
16. Debnath, S.K. and Y. Park, *Real-time quantitative phase imaging with a spatial phase-shifting algorithm*. Optics letters, 2011. **36**(23): p. 4677-4679.
17. Wang, Z., et al., *Spatial light interference microscopy (SLIM)*. Optics Express, 2011. **19**(2): p. 1016-1026.
18. Lue, N., et al., *Quantitative phase imaging of live cells using fast Fourier phase microscopy*. Applied Optics, 2007. **46**(10): p. 1836-1842.
19. Nguyen, T.H., et al., *Gradient light interference microscopy for 3D imaging of unlabeled specimens*. Nature communications, 2017. **8**(1): p. 1-9.
20. Min, J., et al., *Quantitative phase imaging of cells in a flow cytometry arrangement utilizing Michelson interferometer-based off-axis digital holographic microscopy*. Journal of biophotonics, 2019. **12**(9): p. e201900085.
21. Cacace, T., V. Bianco, and P. Ferraro, *Quantitative phase imaging trends in biomedical applications*. Optics and Lasers in Engineering, 2020. **135**: p. 106188.
22. Kasproicz, R., R. Suman, and P. O'Toole, *Characterising live cell behaviour: Traditional label-free and quantitative phase imaging approaches*. The international journal of biochemistry & cell biology, 2017. **84**: p. 89-95.

23. Cuche, E., F. Bevilacqua, and C. Depeursinge, *Digital holography for quantitative phase-contrast imaging*. Optics letters, 1999. **24**(5): p. 291-293.
24. Lee, K., et al., *Quantitative phase imaging techniques for the study of cell pathophysiology: from principles to applications*. Sensors, 2013. **13**(4): p. 4170-4191.
25. Ferraro, P., et al., *Compensation of the inherent wave front curvature in digital holographic coherent microscopy for quantitative phase-contrast imaging*. Applied optics, 2003. **42**(11): p. 1938-1946.
26. Kemper, B. and G. Von Bally, *Digital holographic microscopy for live cell applications and technical inspection*. Applied optics, 2008. **47**(4): p. A52-A61.
27. Popescu, G., *Quantitative phase imaging of nanoscale cell structure and dynamics*. Methods in cell biology, 2008. **90**: p. 87-115.
28. Min, E., et al., *Label-free, multi-scale imaging of ex-vivo mouse brain using spatial light interference microscopy*. Scientific Reports, 2016. **6**: p. 39667.
29. Majeed, H., et al., *Quantitative histopathology of stained tissues using color spatial light interference microscopy (cSLIM)*. Scientific reports, 2019. **9**(1): p. 1-14.
30. Pham, H.V., L. Pantanowitz, and Y. Liu, *Quantitative phase imaging to improve the diagnostic accuracy of urine cytology*. Cancer cytopathology, 2016. **124**(9): p. 641-650.
31. Kim, G., et al., *Learning-based screening of hematologic disorders using quantitative phase imaging of individual red blood cells*. Biosensors and Bioelectronics, 2019. **123**: p. 69-76.
32. Nguyen, T.H., et al., *Automatic Gleason grading of prostate cancer using quantitative phase imaging and machine learning*. Journal of Biomedical Optics, 2017. **22**(3): p. 036015-036015.
33. Goswami, N., et al., *Label-free SARS-CoV-2 detection and classification using phase imaging with computational specificity*. Light: Science & Applications, 2021. **10**(1): p. 176.
34. Sridharan, S., et al., *Prediction of Prostate Cancer Recurrence Using Quantitative Phase Imaging*. Sci. Rep., 2015. **5**.
35. Sridharan, S., et al., *Prediction of prostate cancer recurrence using quantitative phase imaging: Validation on a general population*. Scientific Reports, 2016. **6**.
36. Fanous, M., et al., *Quantitative phase imaging of stromal prognostic markers in pancreatic ductal adenocarcinoma*. Biomedical optics express, 2020. **11**(3): p. 1354-1364.
37. Chen, X., et al., *Wolf phase tomography (WPT) of transparent structures using partially coherent illumination*. Light: Science & Applications, 2020. **9**(1): p. 1-9.
38. Chen, X., M.E. Kandel, and G. Popescu, *Spatial light interference microscopy: principle and applications to biomedicine*. Advances in Optics and Photonics, 2021. **13**(2): p. 353-425.
39. Wang, Z., et al., *Topography and refractometry of nanostructures using spatial light interference microscopy*. Optics letters, 2010. **35**(2): p. 208-210.
40. Kandel, M.E., et al., *Multiscale Assay of Unlabeled Neurite Dynamics Using Phase Imaging with Computational Specificity*. ACS sensors, 2021. **6**(5): p. 1864-1874.
41. Mahjoubfar, A., C.L. Chen, and B. Jalali, *Artificial Intelligence in Label-free Microscopy*. 2017: Springer.
42. Jo, Y., et al., *Quantitative phase imaging and artificial intelligence: a review*. IEEE Journal of Selected Topics in Quantum Electronics, 2018. **25**(1): p. 1-14.
43. Christiansen, E.M., et al., *In silico labeling: Predicting fluorescent labels in unlabeled images*. Cell, 2018. **173**(3): p. 792-803. e19.
44. Ounkomol, C., et al., *Label-free prediction of three-dimensional fluorescence images from transmitted-light microscopy*. Nature methods, 2018. **15**(11): p. 917-920.
45. Jiao, Y., et al., *Computational interference microscopy enabled by deep learning*. APL Photonics, 2021. **6**(4): p. 046103.



46. Rivenson, Y., et al., *PhaseStain: the digital staining of label-free quantitative phase microscopy images using deep learning*. Light: Science & Applications, 2019. **8**(1): p. 1-11.
47. Liu, T., et al., *Deep learning-based super-resolution in coherent imaging systems*. Scientific reports, 2019. **9**(1): p. 1-13.
48. Wang, H., et al., *Deep learning enables cross-modality super-resolution in fluorescence microscopy*. Nature Methods, 2019. **16**(1): p. 103-110.
49. Rivenson, Y., et al., *Virtual histological staining of unlabelled tissue-autofluorescence images via deep learning*. Nature Biomedical Engineering, 2019. **3**(6): p. 466-477.
50. Fanous, M., et al., *Label-free screening of brain tissue myelin content using phase imaging with computational specificity (PICS)*. APL Photonics, 2021. **6**(7): p. 076103.
51. Goswami, N., et al., *Label-free SARS-CoV-2 detection and classification using phase imaging with computational specificity*. Light: Science & Applications, 2021. **10**(1): p. 1-12.
52. Kandel, M.E., et al., *Reproductive outcomes predicted by phase imaging with computational specificity of spermatozoon ultrastructure*. Proceedings of the National Academy of Sciences, 2020. **117**(31): p. 18302-18309.
53. Zhang, J.K., et al., *Label-free colorectal cancer screening using deep learning and spatial light interference microscopy (SLIM)*. APL Photonics, 2020. **5**(4): p. 040805.
54. Kandel, M.E., et al., *Phase imaging with computational specificity (PICS) for measuring dry mass changes in sub-cellular compartments*. Nature communications, 2020. **11**(1): p. 1-10.
55. Baheti, B., et al. *Eff-unet: A novel architecture for semantic segmentation in unstructured environment*. in *Proceedings of the IEEE/CVF Conference on Computer Vision and Pattern Recognition Workshops*. 2020.
56. Hu, C., et al., *Imaging collagen properties in the uterosacral ligaments of women with pelvic organ prolapse using spatial light interference microscopy (SLIM)*. Frontiers in Physics, 2019. **7**: p. 72.
57. Liu, Y., et al., *Methods for quantifying fibrillar collagen alignment*, in *Fibrosis*. 2017, Springer. p. 429-451.
58. Rich, L. and P. Whittaker, *Collagen and picrosirius red staining: a polarized light assessment of fibrillar hue and spatial distribution*. Journal of morphological sciences, 2017. **22**(2): p. 0-0.
59. Wolman, M., *Polarized light microscopy as a tool of diagnostic pathology*. Journal of Histochemistry & Cytochemistry, 1975. **23**(1): p. 21-50.
60. Oldenbourg, R., *Polarized light microscopy: principles and practice*. Cold Spring Harbor Protocols, 2013. **2013**(11): p. pdb. top078600.
61. Deng, J., et al. *Imagenet: A large-scale hierarchical image database*. in *2009 IEEE conference on computer vision and pattern recognition*. 2009. Ieee.
62. Tan, M. and Q. Le. *Efficientnet: Rethinking model scaling for convolutional neural networks*. in *International Conference on Machine Learning*. 2019. PMLR.
63. Hu, C., et al., *Live-dead assay on unlabeled cells using phase imaging with computational specificity*. bioRxiv, 2021: p. 2020.10. 28.359554.
64. Luo, Y., et al., *Single-shot autofocusing of microscopy images using deep learning*. ACS Photonics, 2021. **8**(2): p. 625-638.
65. Goodman, J.W., *Introduction to Fourier optics*. 2005: Roberts and Company Publishers.
66. Oyallon, E. and J. Rabin, *An analysis of the SURF method*. Image Processing On Line, 2015. **5**: p. 176-218.
67. Ronneberger, O., P. Fischer, and T. Brox. *U-net: Convolutional networks for biomedical image segmentation*. in *International Conference on Medical image computing and computer-assisted intervention*. 2015. Springer.

68. Kingma, D.P. and J. Ba, *Adam: A method for stochastic optimization*. arXiv preprint arXiv:1412.6980, 2014.
69. Jaiswal, S., A. Mehta, and G. Nandi. *Investigation on the Effect of L1 and L2 Regularization on Image Features Extracted Using Restricted Boltzmann Machine*. in *2018 Second International Conference on Intelligent Computing and Control Systems (ICICCS)*. 2018. IEEE.
70. He, T., et al. *Bag of tricks for image classification with convolutional neural networks*. in *Proceedings of the IEEE/CVF Conference on Computer Vision and Pattern Recognition*. 2019.
71. Starck, J.-L., E.J. Candès, and D.L. Donoho, *The curvelet transform for image denoising*. IEEE Transactions on image processing, 2002. **11**(6): p. 670-684.
72. Ma, J. and G. Plonka, *The curvelet transform*. IEEE signal processing magazine, 2010. **27**(2): p. 118-133.
73. Conklin, M.W. and P.J. Keely, *Why the stroma matters in breast cancer: insights into breast cancer patient outcomes through the examination of stromal biomarkers*. Cell adhesion & migration, 2012. **6**(3): p. 249-260.
74. Martins Cavaco, A.C., et al., *Collagen biology making inroads into prognosis and treatment of cancer progression and metastasis*. Cancer and Metastasis Reviews, 2020. **39**: p. 603-623.
75. Eklouh-Molinier, C., et al., *Changes of skin collagen orientation associated with chronological aging as probed by polarized-FTIR micro-imaging*. Analyst, 2014. **139**(10): p. 2482-2488.
76. Wu, S., et al., *Quantitative analysis on collagen morphology in aging skin based on multiphoton microscopy*. Journal of biomedical optics, 2011. **16**(4): p. 040502.
77. Yeh, A.T., et al., *Imaging wound healing using optical coherence tomography and multiphoton microscopy in an in vitro skin-equivalent tissue model*. Journal of biomedical optics, 2004. **9**(2): p. 248-253.
